# Supplementary material for: Maternal Methyl Donor Supplementation during Gestation Counteracts the Bisphenol A-Induced Impairment of Intestinal Morphology, Disaccharidase Activity, and Nutrient Transporters Gene Expression in Newborn and Weaning Pigs
Source: MDPI journal article supplement (doi:10.3390/nu9050423), 2017-04-26
Supplement: s1 [file s1]

**Table S1.** Effect of maternal methyl donor or bisphenol A supplementation during gestation on body weight in newborn and weaning pigs.

|                       | Treatment                |                          |                            |                            | <i>p</i> -value |      |           |
|-----------------------|--------------------------|--------------------------|----------------------------|----------------------------|-----------------|------|-----------|
|                       | CON                      | BPA                      | MET                        | BPA + MET                  | BPA             | MET  | BPA × MET |
| No. litters, <i>n</i> | 13                       | 12                       | 13                         | 12                         |                 |      |           |
| No. piglets, <i>n</i> | 12.86 ± 0.89             | 12.62 ± 0.56             | 12.25 ± 1.05               | 14.55 ± 0.90               | 0.24            | 0.45 | 0.15      |
| Birth weight, kg      | 1.24 ± 0.02 <sup>b</sup> | 1.38 ± 0.03 <sup>a</sup> | 1.34 ± 0.03 <sup>a</sup>   | 1.33 ± 0.03 <sup>a</sup>   | 0.01            | 0.66 | <0.01     |
| Weaning weight, kg    | 6.51 ± 0.35 <sup>c</sup> | 7.06 ± 0.51 <sup>b</sup> | 7.74 ± 0.24 <sup>a,b</sup> | 7.14 ± 0.37 <sup>a,b</sup> | 0.95            | 0.09 | 0.16      |

CON, control; BPA, bisphenol A; MET, methyl donor; BPA + MET, both bisphenol A and methyl donor supplementation in control diet. No. litters, *n*: the average number of litters in this group; No. piglets, *n*: the average number of piglets per litter in this group; Birth weight: the average weight of all newborn piglets in this group; Weaning weight: the average weight of all weaning piglets in this group. Within a row, means with different superscript letters are significantly different (*p* < 0.05).
